# Supplementary material
Source: publisher figshare collection journal article supplement (https://acs.figshare.com/ndownloader/files/4620820)

Supporting Information For:

Electronic Band Structure and Photophysical Properties of La-Ga based oxide and oxysulfides

*Kiyonori Ogisu, Akio Ishikawa, Yoshiki Shimodaira, Tsuyoshi Takata, Hisayoshi Kobayashi, and*

*Kazunari Domen*

Figure S-1. Band structure and density of states for  $[\text{LaGaO}_3]_6$  unit cell.

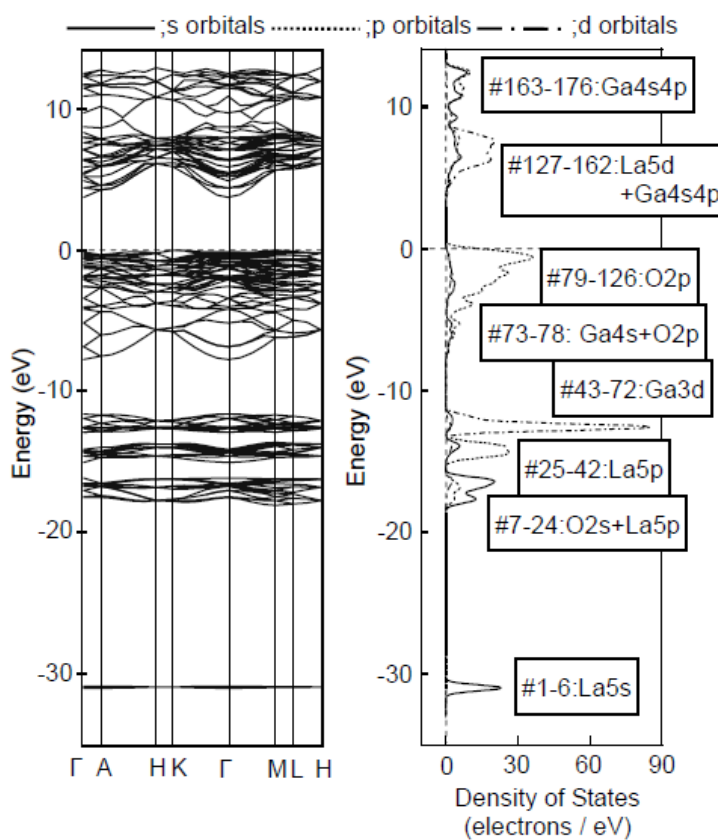

Figure S-2. Band structure and density of states for [LaGaS<sub>2</sub>O]<sub>4</sub> unit cell.

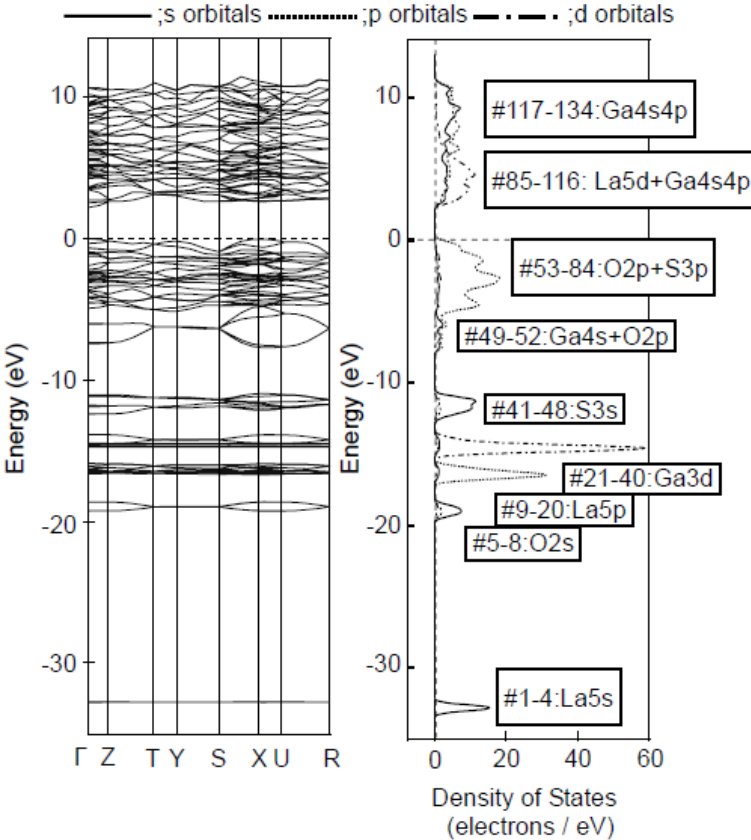

Figure S-3. Band structure and density of states for [LaGaS<sub>5</sub>O]<sub>4</sub> unit cell.

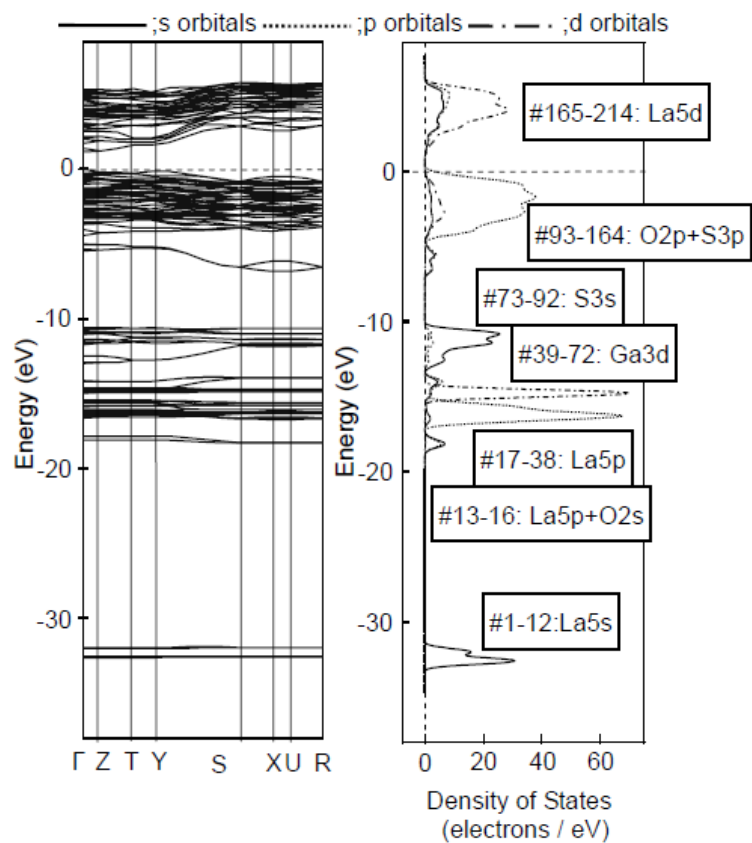

Supplement: Supplementary file 1 [file 4620820]
